# Supplementary material
Source: PubMed Central journal article supplement (PMC3170452)

# Total Syntheses of (+)-Vigulariol and (-)-Sclerophytin A

Michael T. Crimmins, Christina S. Stauffer, and Mark C. Mans

*Kenan, Caudill, Venable, and Murray Laboratories of Chemistry, University of North Carolina at Chapel Hill, Chapel Hill, North Carolina 27599, United States*

*crimmins@email.unc.edu*

## Supporting Information

### <sup>1</sup>H and <sup>13</sup>C Spectra

CSS <sup>1</sup>H NMR, 400 MHz, CDCl<sub>3</sub> )

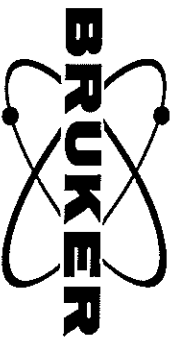

Current Data Parameters  
 NAME CSS II-18-1  
 EXPNO 1  
 PROCNO 1

F2 - Acquisition Parameters  
 Date\_ 20070910  
 Time 10.25  
 INSTRUM spect  
 PROBHD 5 mm QNP 1H/1  
 PULPROG zg30  
 TD 65536  
 SOLVENT CDCl<sub>3</sub>  
 NS 11  
 DS 2  
 SWH 6218.905 Hz  
 FIDRES 0.094893 Hz  
 AQ 5.2691445 sec  
 RG 45.3  
 DW 80.400 usec  
 DE 6.00 usec  
 TE 300.0 K  
 D1 1.00000000 sec  
 TD0 1

==== CHANNEL F1 =====  
 NUC1 <sup>1</sup>H  
 P1 9.30 usec  
 PL1 -3.00 dB  
 SFO1 399.8424924 MHz  
 F2 - Processing parameters  
 SI 32768  
 SF 399.8400000 MHz  
 WDW EM  
 SSB 0  
 LB 0.30 Hz  
 GB 0  
 PC 1.00

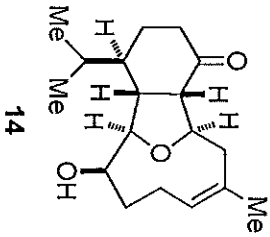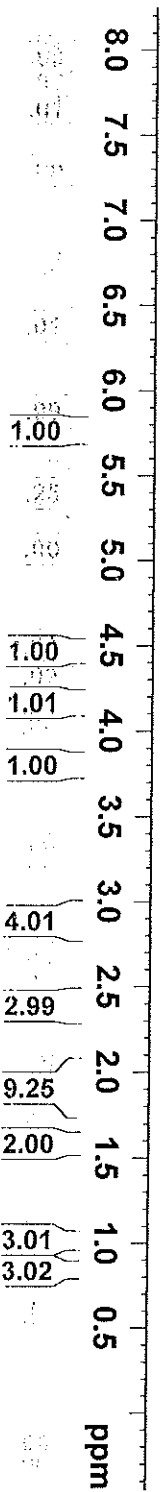

CSS : <sup>13</sup>C NMR, 100 MHz, CDCl<sub>3</sub>

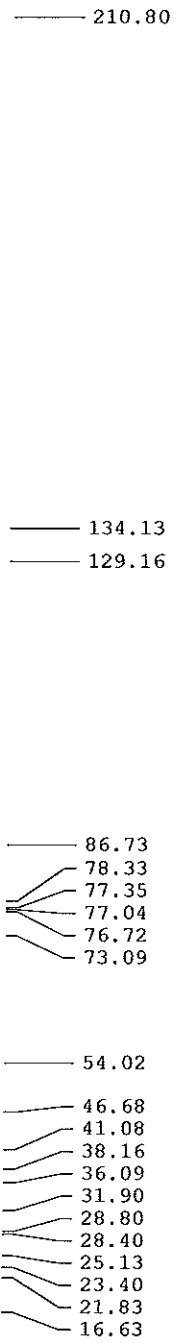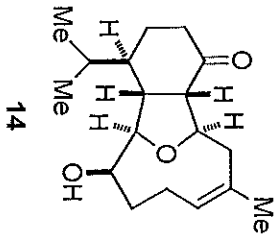

Current Data Parameters  
 NAME CSS IT-18-1  
 EXPNO 2  
 PROCNO 1

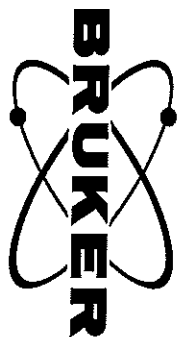

F2 - Acquisition Parameters  
 Date\_ 20070910  
 Time\_ 10.33  
 INSTRUM spect  
 PROBHD 5 mm QNP 1H/1  
 PULPROG zgpg30  
 TD 65536  
 SOLVENT CDCl3  
 NS 134  
 DS 4  
 SWH 23980.814 Hz  
 FIDRES 0.365918 Hz  
 AQ 1.3664756 sec  
 RG 406.4  
 DW 20.850 usec  
 DE 6.00 usec  
 TE 300.0 K  
 D1 2.00000000 sec  
 d11 0.03000000 sec  
 DELTA 1.89999998 sec  
 TD0 1

==== CHANNEL F1 =====  
 NUC1 13C  
 P1 7.25 usec  
 PL1 0.00 dB  
 SFO1 100.5499020 MHz

==== CHANNEL F2 =====  
 CPDPRG2 waltz16  
 NUC2 1H  
 PCPD2 90.00 usec  
 PL2 -3.00 dB  
 PL12 16.72 dB  
 PL13 20.00 dB  
 SFO2 399.8415994 MHz

F2 - Processing Parameters  
 SI 32768  
 SF 100.5398480 MHz  
 WDW EM  
 SSB 0  
 LB 1.00 Hz  
 GB 0  
 PC 1.40

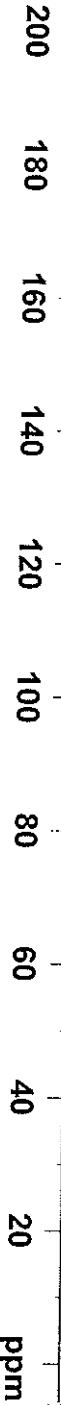

CSS <sup>1</sup>H NMR, 400 MHz, CDCl<sub>3</sub>

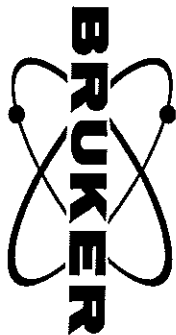

Current Data Parameters  
 NAME CSS-IT-20  
 EXPNO 1  
 PROCNO 1

F2 - Acquisition Parameters  
 Date\_ 20070912  
 Time\_ 11.37  
 INSTRUM spect  
 PROBHD 5 mm Multinucl  
 PULPROG zg30  
 TD 32768  
 SOLVENT CDCl<sub>3</sub>  
 NS 13  
 DS 2  
 SWH 5341.880 Hz  
 FIDRES 0.163021 Hz  
 AQ 3.0672283 sec  
 RG 71.8  
 DW 93.600 usec  
 DE 6.00 usec  
 TE 293.6 K  
 D1 1.00000000 sec  
 TD0 1

===== CHANNEL f1 =====  
 NUC1 <sup>1</sup>H  
 P1 12.00 usec  
 PL1 -3.00 dB  
 SFO1 400.0923618 MHz  
 F2 - Processing parameters  
 SI 32768  
 SF 400.0900000 MHz  
 WDW EM  
 SSB 0  
 LB 1.00 Hz  
 GB 0  
 PC 1.00

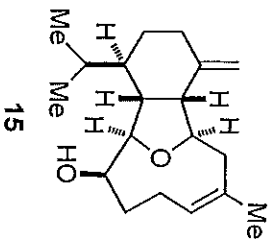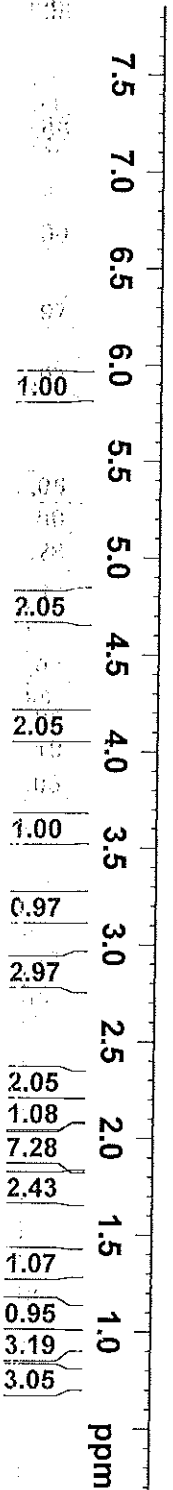

<sup>13</sup>C NMR, 100 MHz, CDCl<sub>3</sub>

- 146.92
- 135.60
- 129.25
- 110.53
- 87.79
- 79.77
- 77.35
- 77.03
- 76.72
- 74.19
- 48.47
- 47.16
- 42.36
- 34.75
- 31.87
- 31.60
- 29.17
- 29.10
- 26.88
- 25.57
- 21.97
- 15.87

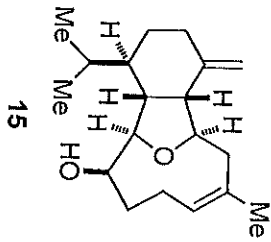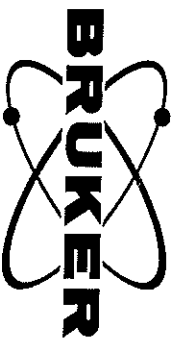

Current Data Parameters  
 NAME CSS-IT-20  
 EXPNO 2  
 PROCNO 1

F2 - Acquisition Parameters  
 Date\_ 20070912  
 Time 11.41  
 INSTRUM spect  
 PROBD 5 mm Multinucl  
 PULPROG zgpg30  
 TD 65536  
 SOLVENT CDCl3  
 NS 105  
 DS 4  
 SMH 24038.461 Hz  
 FIDRES 0.366798 Hz  
 AQ 1.3632196 sec  
 RG 3251  
 DW 20.800 usec  
 DE 6.00 usec  
 TE 293.8 K  
 D1 1.00000000 sec  
 d11 0.03000000 sec  
 DELTA 0.89999998 sec  
 TD0 1

==== CHANNEL f1 =====  
 NUC1 13C  
 P1 6.00 usec  
 PL1 0.00 dB  
 SFO1 100.6137773 MHz

==== CHANNEL f2 =====  
 CPDPRG2 waltz16  
 NUC2 1H  
 PCPD2 80.00 usec  
 PL2 0.00 dB  
 PL12 10.39 dB  
 PL13 11.39 dB  
 SFO2 400.0916004 MHz

F2 - Processing parameters

SI 32768  
 SF 100.6027110 MHz  
 WDW EM  
 SSB 0  
 LB 1.00 Hz  
 GB 0  
 PC 1.40

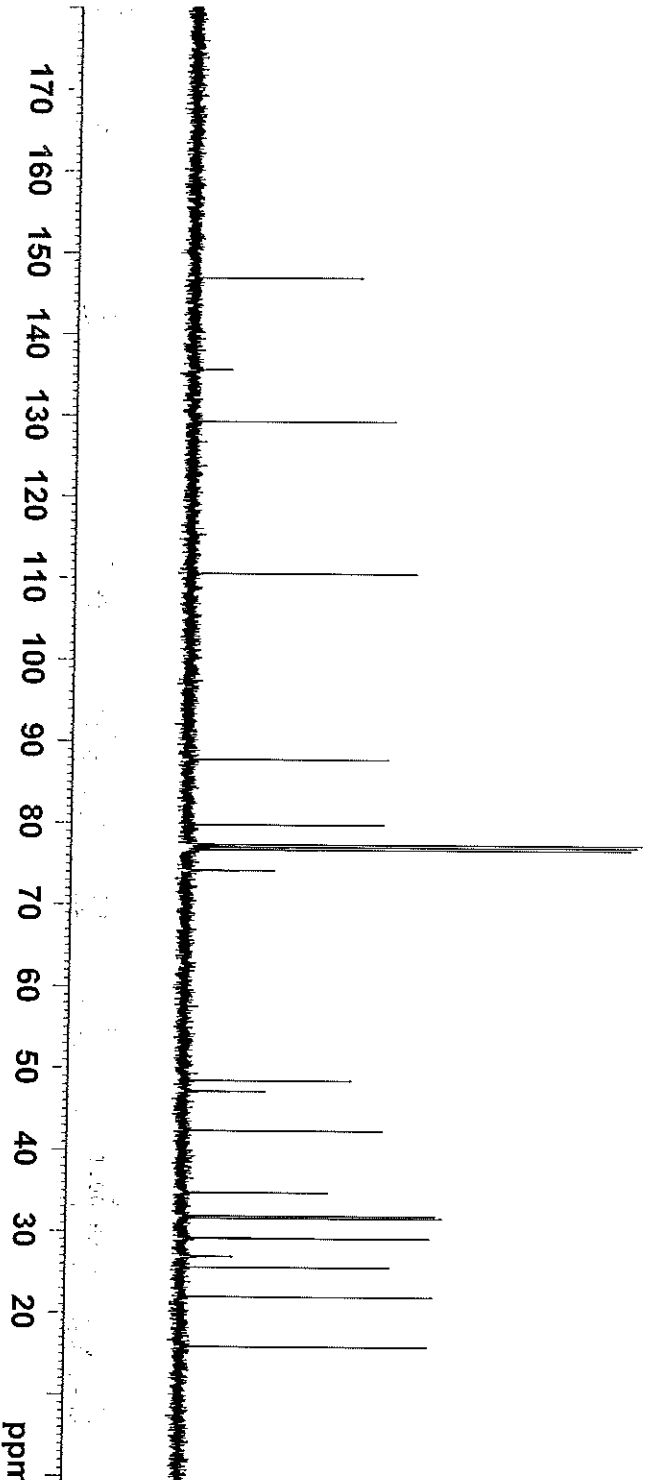

<sup>1</sup>H NMR, 500 MHz, CDCl<sub>3</sub>

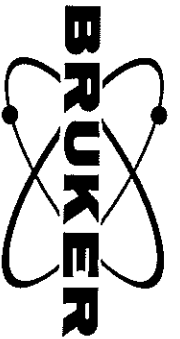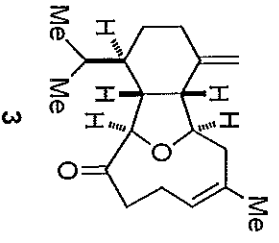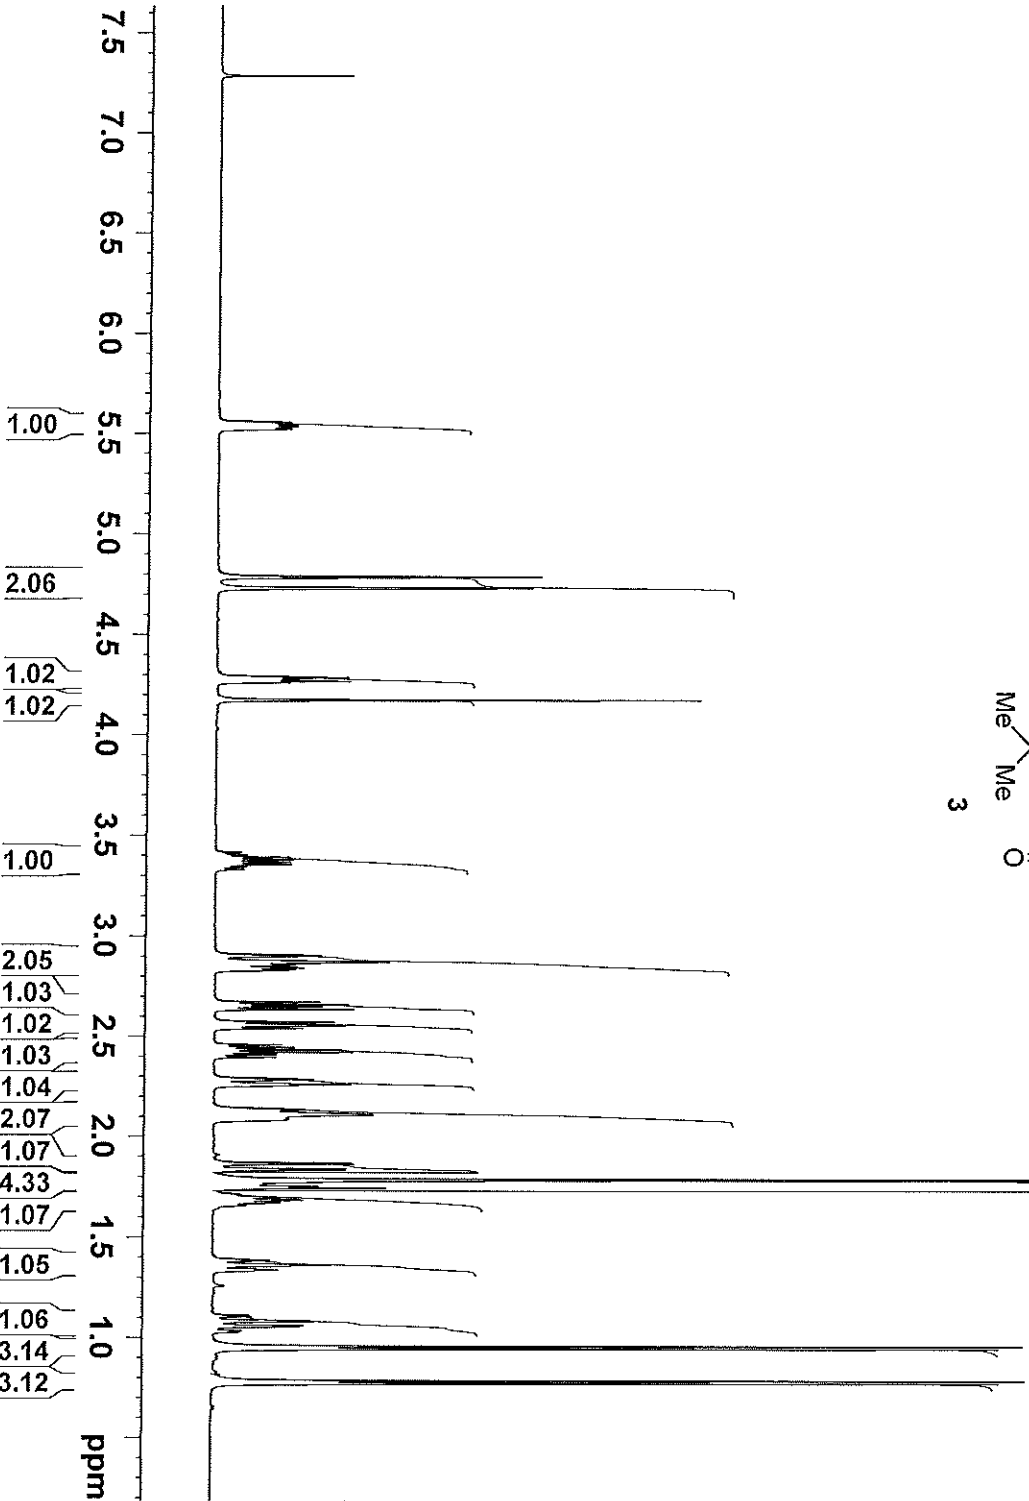

Current Data Parameters  
 NAME css2-21  
 EXPNO 1  
 PROCNO 1

F2 - Acquisition Parameters

Date\_ 20070913  
 Time\_ 10.07  
 INSTRUM spect  
 PROBHD 5 mm SEF 1H-19  
 PULPROG zg30  
 TD 65536  
 SOLVENT CDCl3  
 NS 8  
 DS 2  
 SWH 7507.507 Hz  
 FIDRES 0.114555 Hz  
 AQ 4.3648143 sec  
 RG 28.5  
 DE 66.600 usec  
 TE 291.8 K  
 D1 1.00000000 sec  
 TD0 1

==== CHANNEL F1 =====  
 NUCL1 1H  
 P1 9.65 usec  
 PL1 -3.00 dB  
 SFO1 500.1330008 MHz

F2 - Processing parameters  
 SI 32768  
 SF 500.1300000 MHz  
 WDW EM  
 SSB 0  
 LB 0.25 Hz  
 GB 0  
 PC 1.00

<sup>13</sup>C NMR, 100 MHz, CDCl<sub>3</sub>

- 213.47
- 146.12
- 133.60
- 127.30
- 111.01
- 89.15
- 82.89
- 77.34
- 77.03
- 76.71
- 46.80
- 45.49
- 42.82
- 41.05
- 34.50
- 31.68
- 28.91
- 28.11
- 26.67
- 25.63
- 21.75
- 15.89

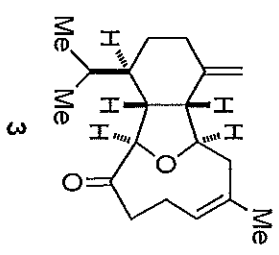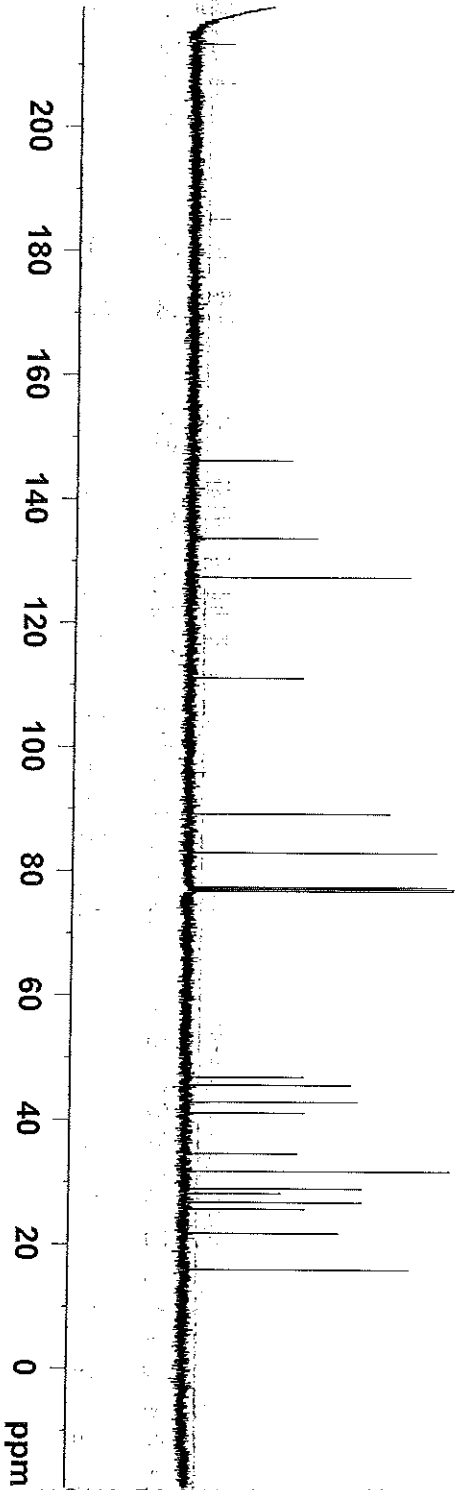

Current Data Parameters  
 NAME CSS 11-21-1  
 EXPNO 2  
 PROCNO 1

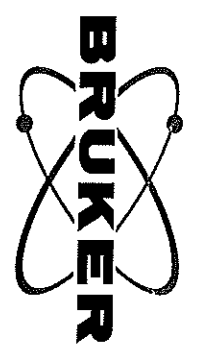

F2 - Acquisition Parameters  
 Date\_ 20070913  
 Time\_ 11.21  
 INSTRUM spect  
 PROBHD 5 mm QNP 1H/1  
 PULPROG zgpg30  
 TD 65536  
 SOLVENT CDCl3  
 NS 90  
 DS 4  
 SWH 23980.814 Hz  
 FIDRES 0.365918 Hz  
 AQ 1.3664756 sec  
 RG 101.6  
 DE 20.850 usec  
 DW 6.00 usec  
 TE 300.0 K  
 D1 2.00000000 sec  
 d11 0.03000000 sec  
 DELTA 1.899999996 sec  
 TDO 1

==== CHANNEL f1 =====  
 NUC1 13C  
 P1 7.25 usec  
 PL1 0.00 dB  
 SFO1 100.5499020 MHz

==== CHANNEL f2 =====  
 CPDPRG2 waltz16  
 NUC2 1H  
 PCPD2 90.00 usec  
 PL2 -3.00 dB  
 PL12 16.72 dB  
 PL13 20.00 dB  
 SFO2 399.8415994 MHz

F2 - Processing parameters  
 SI 32768  
 SE 100.5398480 MHz  
 WDW EM  
 SSB 0  
 GB 0  
 PC 1.40

<sup>1</sup>H NMR, 400 MHz, CDCl<sub>3</sub>

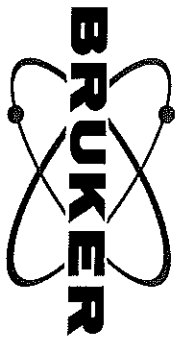

Current Data Parameters  
 NAME CSS II-22  
 EXPNO 1  
 PROCNO 1

F2 - Acquisition Parameters  
 Date\_ 20071005  
 Time\_ 9.30  
 INSTRUM spect  
 PROBHD 5 mm QNP 1H/1  
 PULPROG zg30  
 TD 65536  
 SOLVENT CDCl3  
 NS 8  
 DS 2  
 SWH 6218.905 Hz  
 FIDRES 0.094893 Hz  
 AQ 5.2691445 sec  
 RG 71.8  
 DW 80.400 usec  
 DE 6.00 usec  
 TE 300.0 K  
 D1 1.00000000 sec  
 TDO 1

==== CHANNEL f1 =====  
 NUC1 1H  
 P1 9.30 usec  
 P1L -3.00 dB  
 SFO1 399.8424924 MHz  
 F2 - Processing parameters  
 SI 32768  
 SF 399.840078 MHz  
 WDW EM  
 SSB 0  
 LB 0.30 Hz  
 GB 0  
 PC 1.00

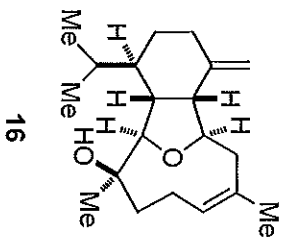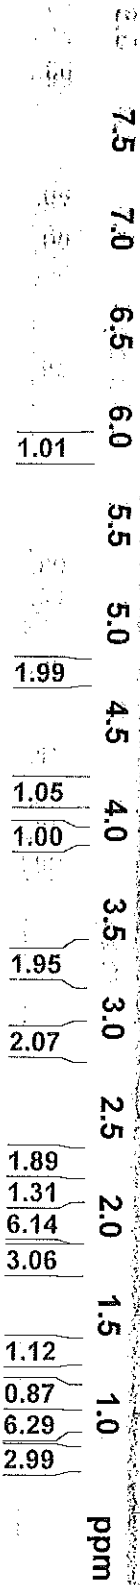

ppm



<sup>13</sup>C NMR, 100 MHz, CDCl<sub>3</sub>

CSS

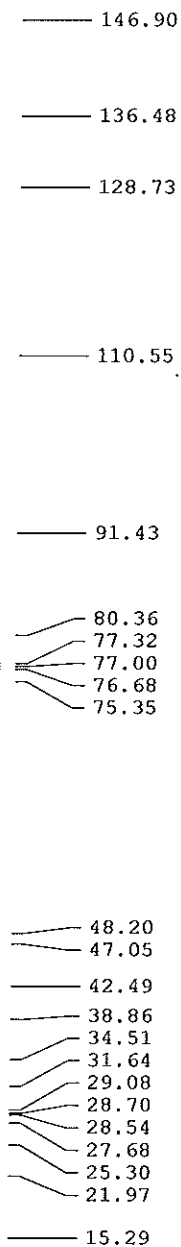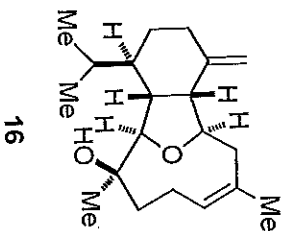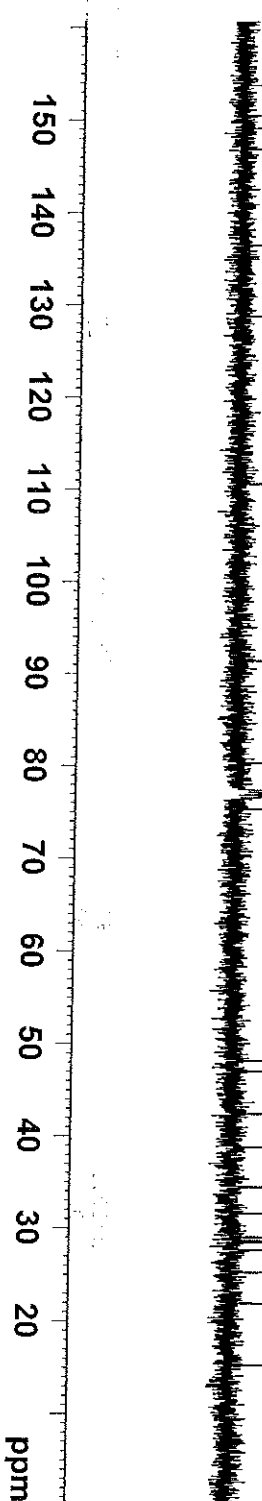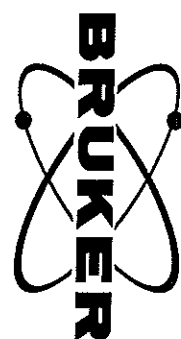

Current Data Parameters  
 NAME CSS II-22  
 EXPNO 2  
 PROCNO 1

F2 - Acquisition Parameters  
 Date\_ 20071005  
 Time\_ 9.40  
 INSTRUM spect  
 PROBHD 5 mm QNP 1H/1  
 PULPROG zgpg30  
 TD 65536  
 SOLVENT CDCl3  
 NS 282  
 DS 4  
 SWH 23980.814 Hz  
 FIDRES 0.365918 Hz  
 AQ 1.3664756 sec  
 RG 161.3  
 DW 20.850 usec  
 DE 6.00 usec  
 TE 300.0 K  
 D1 2.00000000 sec  
 d11 0.03000000 sec  
 DELTA 1.89999998 sec  
 TDO 1

==== CHANNEL F1 =====  
 NUC1 13C  
 P1 7.25 usec  
 PL1 0.00 dB  
 SFO1 100.5499020 MHz

==== CHANNEL F2 =====  
 CPDPRG2 waltz16  
 NUC2 1H  
 PCPD2 90.00 usec  
 PL2 -3.00 dB  
 PL12 16.72 dB  
 PL13 20.00 dB  
 SFO2 399.8415994 MHz

F2 - Processing parameters  
 SI 32768  
 SF 100.5398480 MHz  
 WDW EM  
 SSB 0  
 LB 1.00 Hz  
 GB 0  
 PC 1.40

<sup>1</sup>H NMR, 500 MHz, CDCl<sub>3</sub>

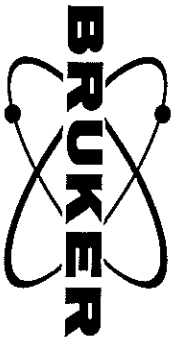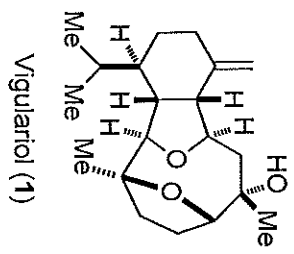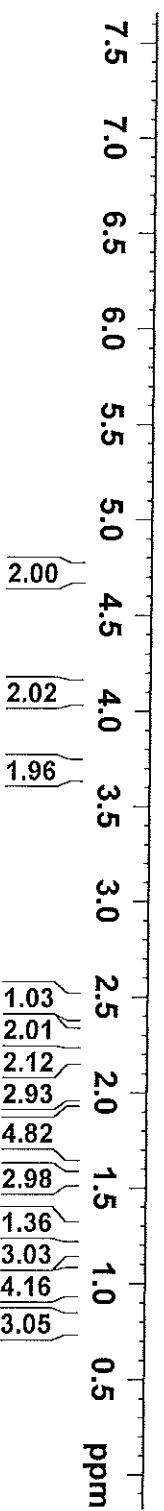

Current Data Parameters  
 NAME CSS IT-202  
 EXPNO 1  
 PROCNO 1

F2 - Acquisition Parameters  
 Date\_ 20080624  
 Time 12.00  
 INSTRUM spect  
 PROBHD 5 mm PABBO BB/  
 PULPROG zg30  
 TD 2330  
 FIDRES 65536  
 NS 65536  
 SOLVENT CDCl3  
 DS 16  
 SWH 7507.507 Hz  
 FIDRES 0.114555 Hz  
 AQ 4.3648143 sec  
 RG 181  
 DW 66.600 usec  
 DE 6.00 usec  
 TE 292.0 K  
 D1 1.00000000 sec  
 TD0 1

==== CHANNEL f1 =====  
 NUCl 1H  
 P1 13.50 usec  
 PL1 0.00 dB  
 SFO1 500.1330008 MHz

F2 - Processing parameters  
 SI 32768  
 SF 500.1300000 MHz  
 WDW EM  
 SSB 0  
 LB 0.25 Hz  
 GB 0  
 PC 1.00

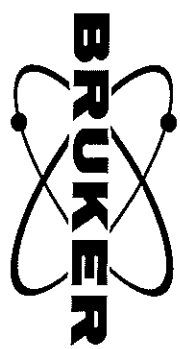

Current Data Parameters  
 NAME CSS IT-202-1  
 EXPNO 2  
 PROCNO 1

F2 - Acquisition Parameters  
 Date\_ 20080624  
 Time\_ 12.59  
 INSTRUM spect  
 PROBHD 5 mm PABBO BB/  
 PULPROG zgpg30  
 TD 65536  
 SOLVENT CDCl3  
 NS 94  
 DS 2  
 SWH 30581.039 Hz  
 FIDRES 0.466630 Hz  
 AQ 1.0715799 sec  
 RG 32768  
 DW 16.350 usec  
 DE 6.00 usec  
 TE 292.5 K  
 D1 1.00000000 sec  
 d11 0.03000000 sec  
 DELTA 0.89999998 sec  
 TD0 1

==== CHANNEL f1 =====  
 NUC1 13C  
 P1 7.00 usec  
 PL1 0.00 dB  
 SFO1 125.7705462 MHz

==== CHANNEL f2 =====  
 CPDPRG2 waltz16  
 NUC2 1H  
 PCPD2 70.00 usec  
 PL2 0.00 dB  
 PL12 14.30 dB  
 PL13 18.00 dB  
 SFO2 500.1320005 MHz

F2 - Processing parameters  
 SI 65536  
 SF 125.7577941 MHz  
 WMW EM  
 SSB 0  
 LB 0.50 Hz  
 GB 0  
 PC 1.40

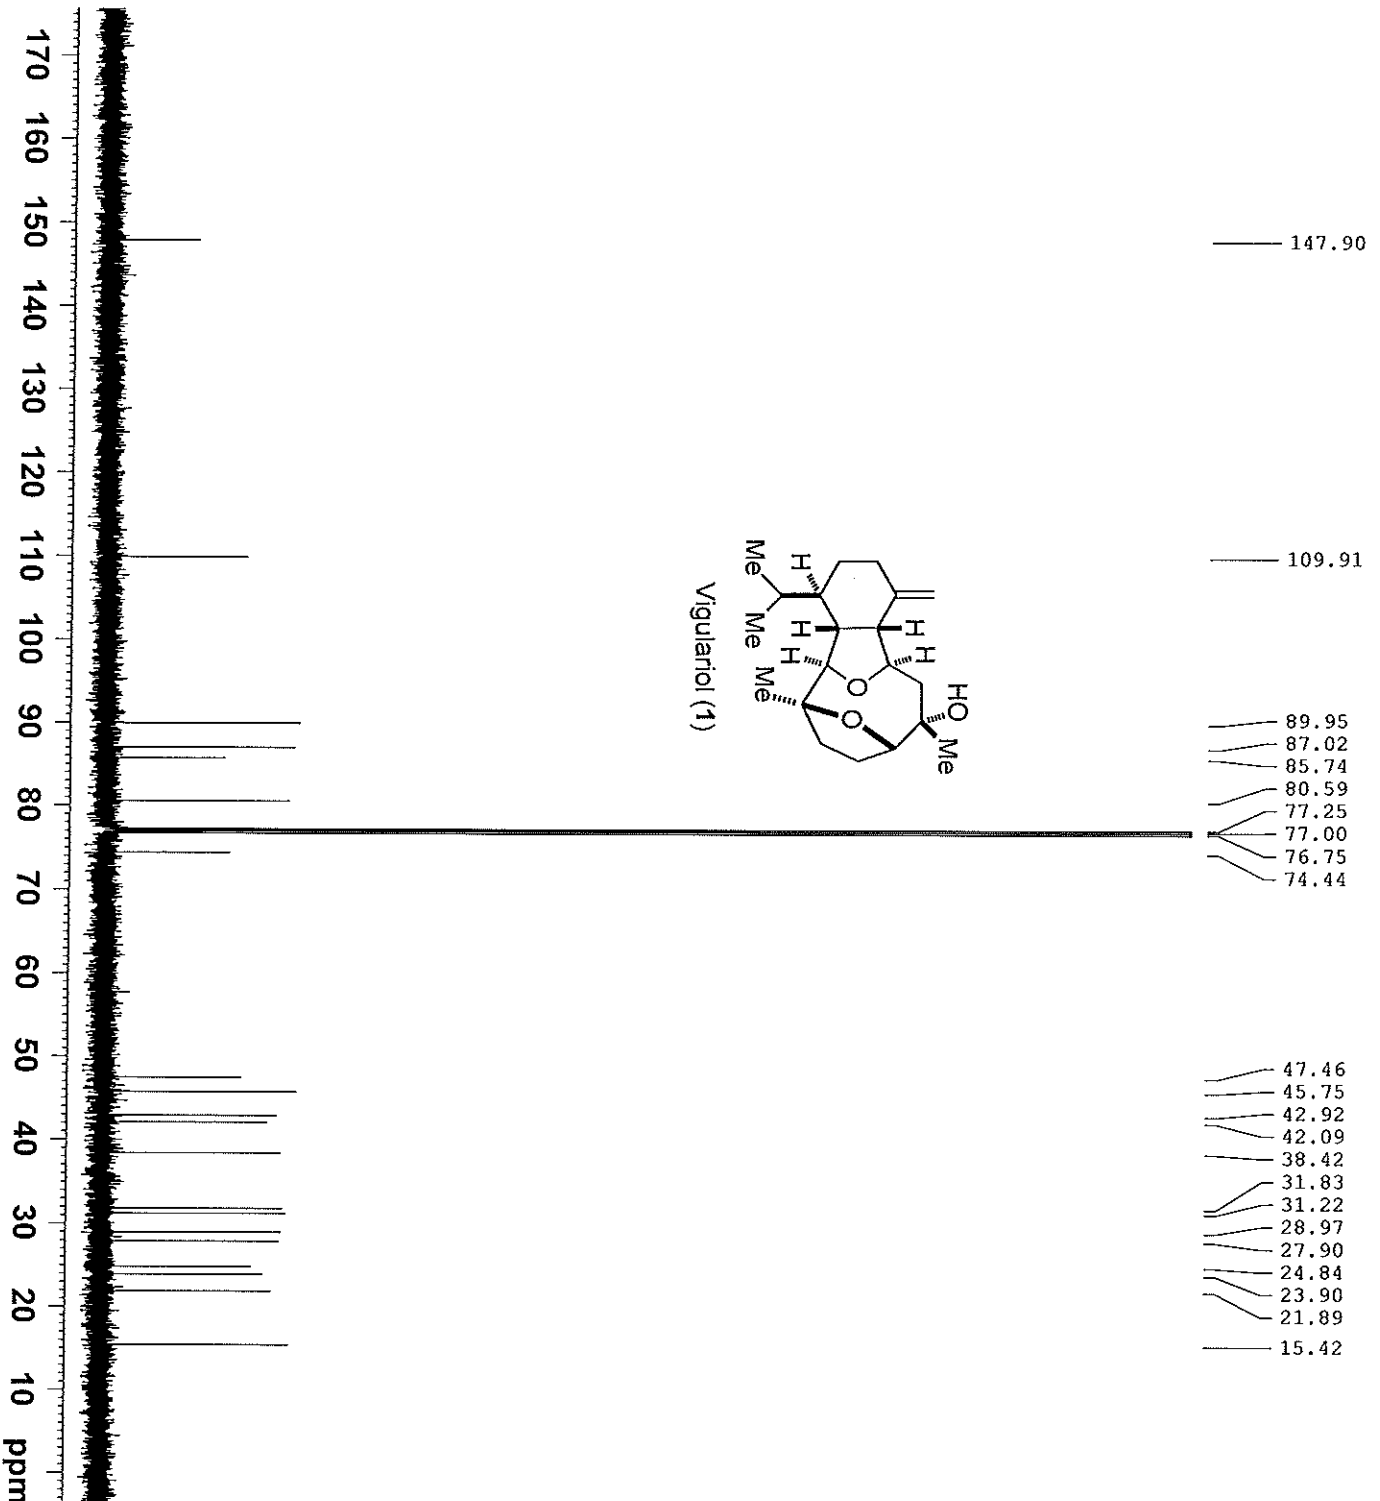

$^1\text{H}$  NMR, 600 MHz,  $\text{CDCl}_3$

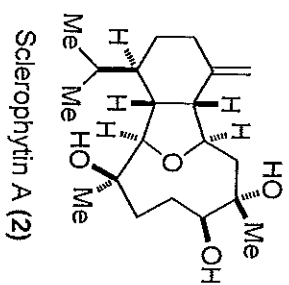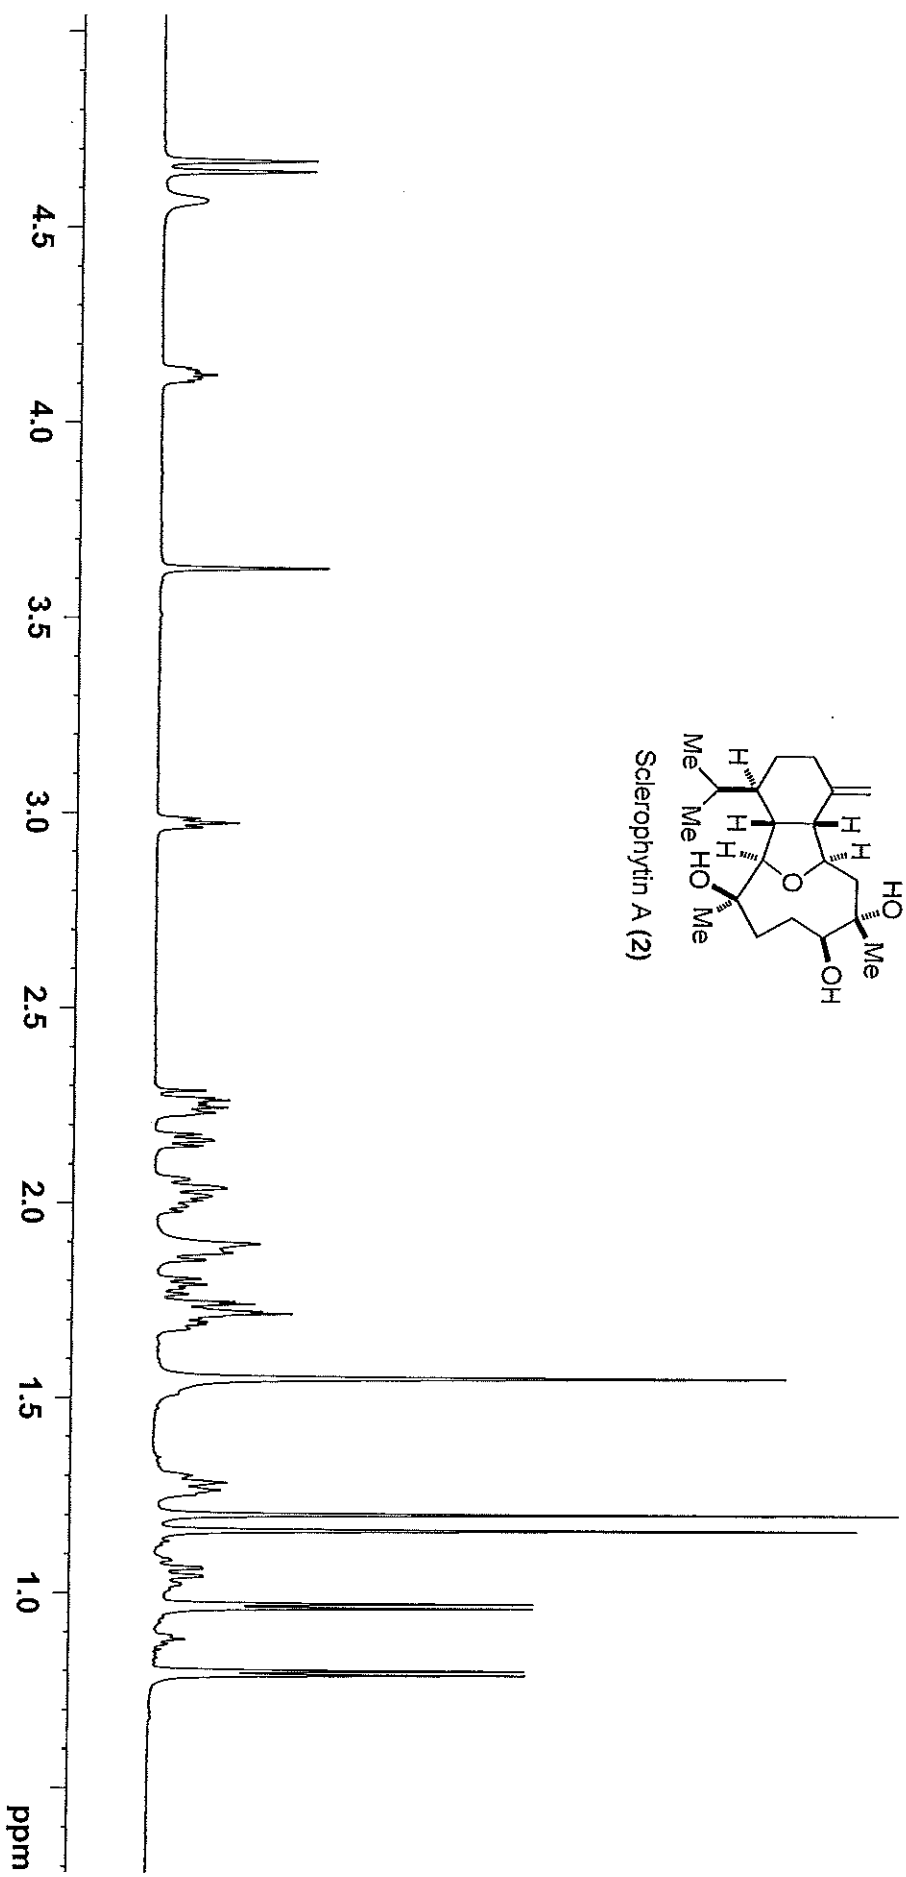

$^{13}\text{C}$  NMR, 150 MHz,  $\text{CDCl}_3$

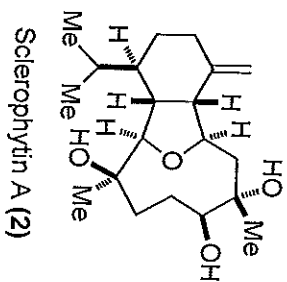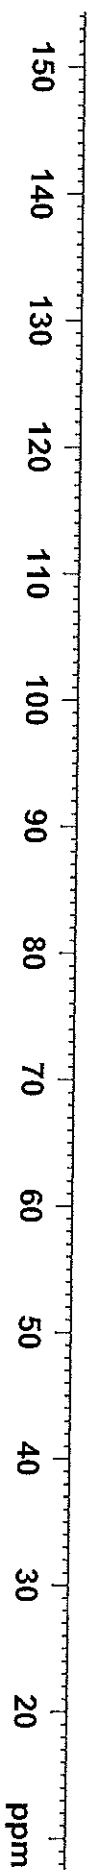

Supplement: NIHMS319810-supplement-1_si_001.pdf [file NIHMS319810-supplement-1_si_001.pdf]
